# Supplementary material for: Circuitry dynamics of the cerebellum inform differential therapeutic responses and patient stratification in essential tremor
Source: Research Square preprint supplement (doi:10.21203/rs.3.rs-8705665/v1), 2026-02-05
Supplement: Supplementary file 1 [file 1571966c95d1ff679a874a18.xlsx]

## Sheet: Fig1
Fig1d					Fig1e					Fig1h					Fig1i
Propranolol(10mg/kg)					Propranolol_Ratio(10mg/kg)					Primidone(1.7mg/kg)					Primidone_Ratio(1.7mg/kg)
Harmaline (n=8)		Grid2(n=8)			Harmaline (n=8)		Grid2(n=8)			Harmaline (n=12)		Grid2(n=7)			Harmaline (n=12)		Grid2(n=7)
Baseline	Treatment	Baseline	Treatment		Baseline	Treatment	Baseline	Treatment		Baseline	Treatment	Baseline	Treatment		Baseline	Treatment	Baseline	Treatment
0.6912	0.05919	0.1133	0.2008		1	0.085634	1	1.77229		1.56217	0.666057	0.143467	0.221181		1	0.426367	1	1.54169
0.8094	0.4958	0.07335	0.1011		1	0.612553	1	1.37832		0.753928	0.483643	0.113154	0.221181		1	0.641498	1	1.95469
1.198	0.435	0.08129	0.1126		1	0.363105	1	1.38516		0.744995	0.427797	0.091445	0.103156		1	0.574228	1	1.12807
1.769	0.07292	0.1883	0.145078		1	0.041221	1	0.770461		0.647318	0.160835	0.23104	0.19989		1	0.248464	1	0.865175
0.87664	0.071	0.126	0.1167		1	0.080991	1	0.92619		1.459	0.483643	0.092661	0.097203		1	0.331489	1	1.04902
0.5395	0.112	0.1565	0.1906		1	0.2076	1	1.21789		0.500031	0.123537	0.385067	0.402766		1	0.247059	1	1.04596
0.5478	0.046282	0.1148	0.1655		1	0.084487	1	1.44164		3.30683	0.419901	0.113154	0.12718		1	0.12698	1	1.12396
0.3231	0.1483	0.09354	0.1536		1	0.458991	1	1.64208		1.459	0.428742				1	0.29386
										1.43313	0.352225				1	0.245773
										1.84974	0.331389				1	0.179154
										1.43313	0.39997				1	0.279088
										1.21883	0.523699				1	0.429674

## Sheet: Fig2
Fig2e_scatter plot				Fig2i_VSS_df						Fig2i_VSS_SNR					Fig2m_Corr_df						Fig2m_Corr_SNR
Freq	FiringRate	BurstRate		VSS 10%	VSS 20%	VSS 40%	VSS 80%	CB LFP		VSS 10%	VSS 20%	VSS 40%	VSS 80%		Xcorr 10%	Xcorr 20%	Xcorr 40%	Xcorr 80%	CB LFP		Xcorr 10%	Xcorr 20%	Xcorr 40%	Xcorr 80%
18.7556	23.0976	1.26829		-0.343514	-0.523514	-0.563514	-0.563514	-0.5		30.0626	23.8921	47.6161	57.2762		-6.52549	-6.52549	-0.537466	-0.537466	-0.5		87.2876	162.322	355.526	691.906
18.7556	14.5122	0.195122		-1.08351	-0.133514	-0.573514	-0.573514	0		19.6759	85.7268	62.3759	66.2442		-0.537466	-1.03647	-0.537466	-0.537466	0		140.538	264.649	245.241	502.69
19.866	26.0667	1.23333		-0.633514	-0.643514	5.33649	-0.563514	0		32.0183	18.5968	36.1935	76.9775		-1.03647	-0.537466	-0.537466	-0.537466	0		224.218	317.6	545.39	801.974
19.866	17.0333	0.233333		-1.16351	-0.523514	-0.583514	-0.573514	0		23.0687	36.9741	40.0186	65.5917		-0.537466	-1.03647	-0.537466	-0.537466	0		107.788	127.802	289.658	519.091
12.7349	30.4118	1.64706		-0.523514	-0.653514	-0.593514	-0.563514	-0.5		29.507	23.3929	31.3845	51.2204		-0.537466	-6.52549	-0.537466	-0.537466	-0.5		185.715	234.438	342.126	793.377
12.7349	16.7941	0.294118		5.39649	10.5365	-0.623514	-0.563514	-0.5		22.0837	30.2504	49.4672	67.0227		-1.03647	-0.537466	-0.537466	-0.537466	-0.5		120.285	247.761	369.294	984.88
11.9997	12.8049	0.317073		-0.733514	-1.02351	-0.613514	-0.553514	1		8.64596	14.9108	30.2319	69.5478		5.45056	-0.537466	-1.03647	-0.537466	1		110.267	332.111	321.892	638.45
11.9997	9.12195	0.0731707		5.35649	5.35649	-1.03351	-0.563514			23.4891	56.0858	54.3416	58.3738		-0.0384636	-1.03647	-0.537466	-0.537466			157.464	257.422	393.191	621.962
11.9994	10.619	0.238095		-0.413514	-0.633514	5.34649	-0.553514	0		50.6586	62.6318	83.7002	95.7901		12.4366	-0.537466	-0.537466	-0.537466	0		164.642	221.063	459.111	584.091
11.9994	8.09524	0.047619		-0.383514	-0.553514	-0.553514	-0.603514			25.3431	35.9557	45.1841	53.9005		-1.03647	-0.537466	-0.537466	-0.537466			138.63	241.025	477.264	848.535
13.2282	18.3714	0.571429		-0.613514	-0.613514	-0.653514	-0.573514	0		25.3239	30.8519	41.4243	63.3164		-0.537466	-0.0384636	-0.0384636	-0.537466	0		141.06	230.267	400.882	521.752
13.2282	8.77143	0.0857143		11.2065	11.1465	-0.543514	-0.613514	0		20.1237	31.245	35.1588	64.1374		12.4366	-0.537466	-0.537466	-0.537466	0		163.429	200.962	641.508	765.688
8.13779	11.1379	0.344828		0.00648649	-0.593514	-0.583514	-0.563514			24.2263	28.6257	39.8409	69.1843		-1.03647	-0.537466	-1.03647	-0.537466			254.547	587.074	747.007	849.195
8.13779	6.62069	0.0517241		11.2265	0.0164865	-0.573514	-0.533514	0		14.4907	28.4082	39.6927	66.8254		-1.03647	-6.52549	-0.537466	-0.537466	0		189.758	260.277	484.284	585.3
11.4542	16.0909	0.272727		-0.543514	-0.533514	-0.613514	-0.523514	-0.5		34.7169	39.6871	41.183	75.1534		-0.0384636	-0.537466	-0.537466	-0.537466	-0.5		181.894	356.832	502.199	697.124
11.4542	9.18182	0.151515		11.6065	-0.193514	-0.573514	-0.623514	-0.5		33.8131	31.6297	59.2028	77.7887		-6.52549	-0.537466	-0.537466	-0.537466	-0.5		160.748	284.533	611.017	754.827
10.821	9.89286	0.178571		17.2865	-0.563514	-0.513514	-0.563514	0		19.9547	27.5524	66.4198	61.8948		-0.537466	-1.03647	-0.537466	-0.537466	0		185.662	463.85	645.888	686.595
10.821	6.32143	0		-0.603514	-0.623514	-0.603514	-0.563514	0		11.857	24.7617	24.2397	58.1958		-6.52549	-0.0384636	-0.537466	-0.537466	0		121.153	260.049	304.755	735.775
10.4663	14.3667	0.166667		-0.463514	-0.533514	-0.523514	-0.543514	0		14.3336	20.3108	46.057	70.4348		-1.03647	-0.537466	-0.537466	-0.537466	0		165.046	227.976	367.698	669.408
10.4663	9.6	0.233333		0.0264865	0.116486	-0.523514	-0.553514	-1		17.2413	28.4746	53.4958	62.7065		-0.537466	-0.537466	-0.537466	-0.537466	-1		117.894	104.523	277.487	847.612
9.27477	14.225	0.15		-0.523514	10.5865	-0.633514	-0.603514	0		27.1674	37.3869	47.1087	66.2571		-8.0225	-0.537466	-0.537466	-0.537466	0		78.7739	145.575	239.483	465.436
9.27477	5.875	0.05		0.0564865	-0.623514	-0.533514	-0.543514	0		25.6209	42.0056	51.7552	70.4394		-6.52549	-0.537466	-0.537466	-0.537466	0		173.044	227.537	596.888	916.985
12.0247	5.575	0		11.1665	11.1065	-0.533514	-0.553514	-1		26.7829	29.4064	67.8961	55.7151		-0.537466	10.9396	-0.537466	-0.537466	-1		139.207	240.43	398.766	621.084
12.0247	6.925	0.075		-0.653514	-0.563514	-0.633514	-0.543514			11.0469	19.0544	37.4511	55.0322		10.9396	-0.537466	-0.537466	-0.537466			86.2921	226.99	397.752	597.627
11.3331	7.4375	0		11.1665	-0.0835135	-0.613514	-0.533514			27.7017	48.0267	44.3727	77.164		-0.537466	-0.537466	-0.537466	-0.537466			254.6	410.7	553.435	1000.12
11.3331	3.33333	0.0208333		-0.613514	-0.673514	-0.193514	-0.513514			41.5244	50.5264	65.6217	57.1758		-0.537466	-0.537466	-0.537466	-0.537466			82.3931	377.062	561.516	726.831
11.3994	7.5	0		11.3765	-0.593514	11.1565	-0.523514	0.5		17.8507	80.5096	70.4448	98.7078		-0.0384636	-0.0384636	-0.537466	-0.537466	0.5		119.118	329.398	415.541	637.569
11.3994	3.5	0		-0.0835135	-0.0135135	-0.563514	-0.573514	0		19.6925	33.1039	41.4715	63.2727		-0.537466	-0.537466	-0.537466	-0.537466	0		264.417	407.193	386.663	647.605
11.7711	6.91429	0.0571429		12.6965	-0.493514	-0.643514	-0.573514	0		24.6754	37.2686	51.479	91.9619		5.45056	-0.537466	-0.537466	-0.537466	0		86.3011	166.249	285.81	698.234
11.7711	3.97143	0		10.7765	-0.503514	-0.573514	-0.563514	0		11.5395	20.3209	30.2141	61.7443		-0.0384636	-0.0384636	-0.0384636	-0.537466	0		151.795	238.242	305.147	704.931
11.8494	9.85	0.05		-0.703514	-0.683514	-0.463514	11.2265	0.5		44.574	101.396	66.4835	67.0608		-0.0384636	-0.537466	-0.537466	-0.537466	0.5		126.273	346.949	329.105	644.384
11.8494	3.85	0		-0.473514	-0.663514	-0.503514	-0.553514			27.9945	37.3088	51.1576	60.7201		-1.03647	-0.537466	-0.537466	-0.537466			349.38	286.241	347.025	714.108
12.0497	8.7	0		-3.36351	-0.593514	-0.553514	-0.603514			12.269	14.7878	85.7107	81.318		-0.537466	-1.03647	-0.537466	-0.537466			110.755	206.821	321.748	688.15
12.0497	2.725	0		-0.403514	5.32649	-0.563514	-0.553514			54.9149	27.9058	54.8184	65.6057		-1.03647	-0.537466	-0.537466	-0.537466			91.9631	178.503	261.652	681.928
11.9553	9.31111	0.0444444		10.6965	-0.593514	-0.603514	-0.533514			12.7202	29.7978	43.3447	79.9093		-0.537466	-0.0384636	-0.537466	-0.537466			86.3848	232.244	483.819	695.942
11.9553	3.6	0		-0.473514	11.0065	-0.613514	-0.573514			18.0074	25.4625	44.1648	49.3899		-0.0384636	-0.537466	-0.537466	-0.537466			131.52	248.707	502.074	681.178
11.9494	10.35	0		11.6365	-0.703514	5.29649	-0.563514			17.4231	30.1064	25.3611	60.7671		-0.537466	-0.537466	-0.537466	-0.537466			146.346	190.287	676.916	687.005
11.9494	3.05	0		0.00648649	-0.643514	-0.563514	-0.573514			13.7462	17.3413	37.8865	56.2964		-0.0384636	-0.537466	-0.537466	-0.537466			110.065	213.931	472.098	996.161
13.1664	5.55	0.05		-0.573514	-0.603514	11.0865	-0.563514			17.7354	46.022	42.9653	71.5549		-6.52549	-0.537466	-0.537466	-0.537466			135.592	208.278	434.519	862.129
13.1664	0.55	0		-0.693514	-0.613514	-0.583514	-0.573514			14.559	27.3639	33.4014	50.4136		-0.537466	-0.537466	-0.0384636	-0.537466			209.958	248.747	343.514	596.778
11.5598	6.38	0		-0.613514	-0.663514	-0.633514	-0.563514			33.9435	36.9506	48.8027	63.4727		-0.0384636	-0.537466	-0.537466	-0.537466			95.1765	141.773	313.7	574.628
11.5598	3.5	0		-0.563514	-0.613514	-0.543514	-0.493514			47.2792	53.7716	54.87	69.5223		12.9356	-0.537466	-0.537466	-0.537466			130.317	263.227	519.495	688.126
7.57107	147.619	7.33333		-0.683514	5.34649	11.4465	-0.563514			12.1516	15.3551	35.6805	69.5953		-0.537466	-0.537466	-0.537466	-0.537466			115.756	220.103	401.719	700.842
7.57107	54.8095	4.14286		-0.673514	-0.503514	-0.443514	-0.573514			33.8059	31.64	66.3427	75.3759		-6.52549	-0.537466	-0.537466	-0.537466			97.5569	154.351	549.814	753.403
7.57107	43.4286	2.80952		-1.04351	-0.523514	-0.543514	-0.573514			28.2254	10.5224	30.5494	77.72		-0.537466	-0.537466	-0.537466	-0.537466			57.2867	160.082	580.902	657.129
7.57107	11.4286	0.0952381		-0.613514	-0.653514	-0.653514	-0.523514			55.6283	44.7743	46.925	54.3211		11.9376	-0.537466	-0.537466	-0.537466			125.176	208.934	321.661	599.718
9.69193	126.731	5.76923		-0.653514	-0.483514	-0.503514	-0.523514			8.3021	29.9301	56.1235	89.8248		-1.03647	-0.0384636	-0.537466	-0.537466			103.367	213.765	381.469	556.735
9.69193	42.1154	2.96154		5.39649	11.3965	-0.503514	-0.563514			16.3517	48.6112	66.8703	92.5725		-0.537466	-0.537466	-0.537466	-0.537466			84.1482	245.908	244.535	543.075
9.69193	37.6538	2.46154		-0.593514	-0.523514	-0.593514	-0.533514			12.7562	26.3954	44.8953	64.6098		-1.03647	-0.537466	-0.537466	-0.537466			112.935	306.314	355.627	748.106
9.69193	10.8077	0.346154		-0.443514	5.36649	-0.583514	-0.533514			21.481	41.362	38.1732	73.1583		-6.52549	-0.537466	-0.537466	-0.537466			140.489	269.356	629.285	559.081
13.7247	58.575	2.825		-0.773514	17.2665	-0.493514	-0.533514			30.3104	41.4948	39.212	66.394		-0.537466	-0.0384636	-0.537466	-0.537466			108.188	337.675	424.481	613.031
13.7247	29	1.725		-0.483514	-0.593514	-0.493514	-0.573514			34.9415	26.3173	54.936	80.8523		8.44457	-0.537466	-0.537466	-0.537466			106.151	201.24	501.442	597.292
13.7247	26.15	0.875		11.4565	-0.633514	-0.583514	-0.583514			15.6069	25.1323	51.3762	93.0904		-0.537466	-0.0384636	-0.537466	-0.537466			79.0384	168.446	313.551	551.83
13.7247	4.55	0.025		-0.603514	-0.623514	-0.643514	-0.563514			38.5756	36.3311	63.036	68.5044		11.4386	-6.52549	-0.537466	-0.537466			101.235	245.103	297.239	695.198
12.4588	43.5738	2.5082		5.37649	-0.473514	-0.653514	-0.563514			23.4497	73.4983	88.5442	72.1843		-0.0384636	-0.537466	-0.537466	-0.537466			120.612	158.906	264.678	523.952
12.4588	16.4426	0.918033		17.3165	11.5465	-0.543514	5.34649			32.1488	24.271	61.1994	78.5252		-0.537466	-0.537466	-0.537466	-0.537466			146.635	728.424	660.861	781.05
12.4588	18.0164	0.360656		-6.63351	-0.513514	-0.513514	-0.573514			21.6276	32.6061	60.9434	68.7407		-0.537466	-0.537466	-0.537466	-0.537466			147.713	244.972	544.188	627.746
12.4588	1.83607	0		-0.573514	-6.63351	-0.553514	-0.563514			8.70878	32.9431	36.9147	70.2968		12.4366	-1.03647	-0.537466	-0.537466			126.872	282.533	368.125	774.657
12.9306	25.5172	0.724138		5.26649	-0.613514	-0.633514	-0.573514			42.4367	42.3725	55.4286	76.6574		-0.537466	-0.0384636	-0.0384636	-0.537466			121.625	177.786	362.81	851.872
12.9306	17.8276	1.17241		10.8965	5.27649	-0.513514	-0.543514			24.6699	13.5631	27.6252	64.3633		-1.03647	-0.537466	-0.537466	-0.537466			106.785	223.17	350.444	574.539
12.9306	16.931	0.413793		-0.593514	11.1965	-0.393514	-0.563514			7.59839	21.8859	43.3079	77.8402		-6.02649	-1.03647	-0.537466	-0.537466			85.5895	188.023	288.123	600.272
12.9306	1.65517	0		-0.423514	-0.643514	-0.563514	-0.503514			12.9084	29.7464	45.0225	74.3041		-0.537466	-0.537466	-0.537466	-0.537466			176.464	312.773	547.774	800.896
13.1139	83.0571	3.34286		11.6065	5.31649	-0.503514	-0.533514			10.2186	12.2161	35.492	85.5883		5.45056	-0.537466	-0.537466	-0.537466			71.7173	133.136	241.277	680.969
13.1139	18.7429	0.8		-0.463514	-0.123514	-0.553514	-0.543514			20.9731	33.7866	41.0873	72.2981		10.4406	-0.537466	-0.537466	-0.537466			151.453	342.314	460.982	659.725
13.1139	19.6857	0.542857		-0.663514	0.0664865	-0.493514	-0.553514			11.4218	30.1194	32.7704	52.0792		-6.52549	-0.537466	-0.537466	-0.537466			148.477	216.93	366.142	611.614
13.1139	3.54286	0.0285714		10.8365	-0.573514	-0.523514	-0.543514			12.9116	17.9225	33.5878	68.1872		-0.537466	-6.52549	-0.537466	-0.537466			138.934	240.106	303.719	448.626
12.1662	99.6667	3.33333		-0.733514	-0.623514	-0.613514	-0.563514			54.6098	43.6986	64.7331	81.6525		-0.537466	-0.537466	-0.537466	-0.537466			182.961	255.262	548.119	623.056
12.1662	15.7917	0.583333		5.34649	11.3365	-0.543514	-0.543514			41.5097	18.4506	45.1536	87.1108		-0.0384636	-0.537466	-0.537466	-0.537466			213.483	223.565	555.253	777.261
12.1662	21.5417	0.625		-1.07351	-0.723514	-0.503514	-0.553514			18.8481	24.9114	33.4047	56.6157		-0.537466	-0.537466	-0.537466	-0.537466			143.747	146.885	355.193	598.408
12.1662	1.625	0		10.5065	-0.483514	-0.553514	-0.563514			17.8118	42.5868	49.5191	59.8683		-7.52349	-6.52549	-0.537466	-0.537466			181.76	197.722	497.654	908.537
13.6125	36.871	1.03226		0.126486	-0.503514	-0.593514	-0.533514			21.1439	39.1395	45.6654	63.1353		-1.03647	-0.537466	-0.537466	-0.537466			142.313	524.722	384.093	563.201
13.6125	8.58065	0.16129		-0.543514	5.37649	-0.533514	-0.563514			14.8085	18.5436	55.3184	49.0295		10.4406	-6.52549	-0.537466	-0.537466			113.906	239.881	269.394	589.759
13.6125	14.7419	0.16129		11.4065	-0.633514	-0.563514	-0.573514			20.2607	29.3153	34.5625	73.9579		-6.52549	-0.537466	-0.537466	-0.537466			102.044	234.044	266.818	551.622
13.6125	1.54839	0		-0.683514	-0.473514	-0.583514	-0.563514			27.1599	47.0782	67.1799	63.3731		-5.02848	-0.537466	-0.537466	-0.537466			137.405	213.4	250.958	495.002
13.4342	11.3913	0.347826		-0.193514	-0.0635135	-0.593514	-0.523514			24.5963	25.0625	40.9294	56.9109		-0.537466	-1.03647	-0.537466	-0.537466			225.858	362.527	544.501	649.857
13.4342	6.56522	0.130435		-0.413514	-0.593514	-0.493514	-0.573514			31.6766	30.8335	46.539	53.417		6.44856	-0.537466	-1.03647	-0.537466			119.023	134.017	318.879	595.345
13.4342	10.8696	0.130435		-0.613514	12.3865	-0.533514	-0.593514			22.6804	20.1667	43.4797	68.0856		-6.02649	-0.537466	-0.537466	-0.537466			144.844	173.173	271.158	704.232
13.4342	1.04348	0		-0.493514	-0.553514	-0.553514	-0.513514			20.2589	18.63	43.3856	70.6747		-0.537466	-0.537466	-0.0384636	-0.537466			246.892	236.047	562.507	933.201
10.0765	56.8846	5.03846		10.0665	-0.573514	-0.563514	-0.513514			13.3418	41.7236	59.5409	66.0069		17.4266	-0.537466	-0.537466	-0.537466			58.8048	152.393	512.196	645.829
10.0765	40.8077	2.65385		-0.133514	-0.0635135	-0.503514	-0.553514			26.1632	18.2001	38.4623	66.7501		-0.537466	-1.03647	-0.537466	-0.537466			181.297	270.255	375.587	711.894
13.2267	40.7273	3.31818		-0.553514	-0.623514	-0.523514	-0.573514			28.6022	14.9123	53.875	87.1561		9.94158	-0.537466	-0.537466	-0.537466			180.914	355.079	458.208	600.529
13.2267	29.7273	2.13636		12.3665	-0.563514	-0.623514	-0.563514			52.0504	48.0062	54.6793	77.3776		-1.03647	-0.537466	-0.537466	-0.537466			89.0935	161.612	302.813	646.905
13.7926	37.4828	2.37931		-0.603514	-0.563514	-0.603514	-0.553514			22.3509	19.9901	34.3635	83.85		-0.537466	-0.537466	-0.537466	-0.537466			103.163	229.426	489.088	722.427
13.7926	27.8966	1.41379		-0.533514	-0.603514	-0.653514	-0.533514			14.6242	13.4412	32.201	57.0484		-1.03647	-0.537466	-0.537466	-0.537466			323.445	192.214	561.559	999.089
12.5811	35.4419	2.7907		-0.633514	-0.513514	-0.503514	-0.563514			10.6407	18.8076	37.1259	53.2646		-0.537466	-0.0384636	-0.537466	-0.537466			240.068	337.668	529.663	724.239
12.5811	23.2791	0.837209		-1.15351	-0.523514	-0.593514	-0.553514			75.1995	86.4696	76.7255	62.9322		-6.52549	-0.537466	-0.537466	-0.537466			99.987	197.465	373.036	539.601
12.6144	39.1538	3.23077		-1.14351	-0.553514	-0.553514	-0.513514			29.9799	53.8157	49.9161	66.885		-3.53148	-0.537466	-0.537466	-0.537466			171.121	236.449	428.956	626.958
12.6144	24.3077	0.615385		-0.513514	5.29649	-0.503514	-0.563514			42.3229	62.2548	62.5708	65.4007		17.4266	-0.537466	-0.537466	-0.537466			142.611	243.794	371.129	751.322
12.1992	26.5333	1.6		-0.553514	-0.633514	-0.573514	-0.573514			13.4886	10.472	22.9151	60.7264		-0.537466	-0.537466	-0.537466	-0.537466			90.1086	163.22	416.174	550.107
12.1992	22.2667	0.533333		-6.54351	-0.513514	-0.623514	-0.533514			19.2786	10.0629	29.6853	56.8149		-0.537466	-0.537466	-0.537466	-0.537466			201.004	253.181	733.619	693.092
13.999	46.5	4.14286		-0.483514	-0.593514	-0.563514	-0.543514			15.9706	25.0664	37.6024	76.6043		-0.537466	-0.537466	-0.537466	-0.537466			115.056	288.444	542.269	1002.53
13.999	30.6429	2.35714		-0.643514	-1.06351	-0.00351351	-0.523514			14.2378	33.2951	54.7401	71.0705		-0.537466	-0.0384636	-0.537466	-0.537466			133.083	202.392	509.674	700.44
8.37119	53.4571	2.94286		-0.443514	10.5465	-0.543514	-0.553514			22.7195	35.6529	68.662	74.4223		-0.537466	-0.537466	-0.537466	-0.537466			87.5168	218.728	373.016	686.837
8.37119	10.2857	0.0285714		-0.563514	-0.563514	-0.543514	-0.543514			26.4419	28.4954	24.1052	77.6054		-0.537466	-0.537466	-0.0384636	-0.537466			152.248	322.199	769.437	716.587
14.8026	58.9437	2.83099		-0.583514	0.0664865	-0.633514	-0.543514			28.431	35.9393	52.1007	62.5421		-6.52549	-0.537466	-0.537466	-0.537466			150.763	149.604	301.774	523.029
14.8026	12.2958	0.28169		10.5465	-0.463514	-0.573514	-0.533514			43.5037	33.9135	41.8276	74.1433		-0.537466	-0.537466	-0.537466	-0.537466			119.627	207.053	265.62	681.07
10.8316	8.60396	0.306931		-0.543514	-0.0135135	-0.603514	-0.553514			49.8552	68.4941	65.3704	82.3883		-6.52549	-0.537466	-0.537466	-0.537466			133	163.878	267.977	741.529
10.8316	4.0396	0.00990099		-0.693514	-0.933514	-0.493514	-0.563514			17.3785	29.9684	30.9513	61.2736		-0.537466	-0.537466	-0.537466	-0.537466			157.558	357.803	537.441	701.588
11.6919	27.1923	1.19231		-0.483514	-0.503514	-0.533514	-0.503514			20.2947	24.1855	34.1268	59.1954		-0.537466	-0.537466	-0.537466	-0.537466			113.111	310.215	463.007	1033.17
11.6919	3.07692	0.0384615		-0.133514	-0.613514	0.0264865	-0.573514			12.0951	32.015	41.8031	56.9261		-8.0225	-0.537466	-0.0384636	-0.537466			213.148	185.1	313.407	780.676
11.6361	45.0909	2.93182		10.6465	-0.483514	-0.563514	-0.553514								-0.0384636	-0.537466
11.6361	4.34091	0.0227273		-1.04351	-0.0135135	-0.553514	-0.543514								10.9396	-0.537466
11.7024	48.9189	3.24324		-0.553514	0.106486	5.36649									-0.537466	-1.03647
11.7024	4.67568	0.027027		11.2565	-0.563514	-0.533514									-0.537466
14.0379	18.9615	1.15385		-0.473514	-0.623514										-0.537466
14.0379	2.5	0		-0.533514	5.34649										-0.537466
10.8962	15.5172	0.724138		-0.0135135	11.5665										-1.03647
10.8962	1	0		0.0364865	-0.653514										-6.52549
				-0.523514											-0.537466
				-0.513514											-0.537466
				11.5065											-1.03647
															-6.52549
															-0.537466
															-0.0384636
															-0.0384636
															12.9356
															-0.537466
															5.45056
															-6.52549
															-0.537466
															-0.0384636
															-0.537466
															-0.537466
															-0.0384636
															10.9396
															-0.537466
															-0.0384636
															-3.53148
															-0.537466
															-1.03647
															-6.52549
															-0.537466
															5.45056
															-6.52549
															-0.537466
															-0.537466
															-0.537466
															11.4386
															-0.537466
															10.4406
															-0.537466
															-0.537466
															-0.537466

## Sheet: Fig3
Fig3i			Fig3m_cluster number			Fig3n_cluster area			Fig3o_Time			Fig3p_Shape
Harmaline	Grid2		Harmaline	Grid2		Harmaline	Grid2		Harmaline	Grid2		Harmaline	Grid2
0.0995106	0.642404		23	1		470	474		218	35		0.0229358	0.428571
0.107597	0.672808		2	1		208	418		106	33		0.0188679	0.454545
0.0921653	0.606289		10	7		723	310		237	29		0.0295359	0.517241
0.130557	0.692083		6	2		302	134		92	20		0.0652174	0.75
0.348683	0.612183		11	7		306	170		67	20		0.164179	0.75
0.0932277	0.670115		19	2		122	367		29	30		0.37931	0.5
0.0872324	0.846017		8	3		451	236		58	20		0.344828	0.75
0.0446034	0.906971		11	11		335	195		97	18		0.113402	0.833333
0.0784031	0.871027		13	10		117	160		45	15		0.111111	1
0.0461258	0.392152		9	3		169	786		33	37		0.545455	0.702703
0.336472	0.451962		21	4		162	799		34	36		0.5	0.722222
0.321695	0.496415		20	3		877	279		209	29		0.0526316	0.482759
0.238015	0.664404		14	5		207	158		20	20		1	0.5
0.235813	0.670093		9	6		161	477		48	35		0.125	0.742857
0.225968	0.743972		11	5		156	516		45	29		0.133333	0.896552
0.0903638	0.716111		9	9		195	497		30	64		0.666667	0.40625
0.112248	0.737422		15	11		216	443		78	53		0.0769231	0.245283
0.0381276	0.698808		9	7		149	267		32	39		0.34375	0.307692
0.0932005	0.771983		2	9		116	897		71	44		0.0422535	0.590909
0.176806	0.844903		5	5		104	528		24	29		0.5	0.896552
0.138689	0.795505		8	13		104	214		64	58		0.03125	0.172414
0.232536	0.808072		12	11		113	583		87	40		0.0229885	0.5
0.21241	0.828032		8	10		138	542		35	59		0.342857	0.338983
0.107805	0.803587		6	9		7847	544		350	64		0.0914286	0.3125
0.218655	0.56784		9	4		1468	255		339	27		0.020649	0.740741
0.180909	0.48296		18	2		167	637		90	62		0.0222222	0.322581
0.285289	0.562382		20	5		458	232		139	22		0.0863309	0.909091
0.255485	0.707157		15	5		346	375		118	33		0.059322	0.606061
0.2562	0.713342		12	1		179	220		112	25		0.0178571	0.8
0.180381	0.601209		13	1		156	345		63	39		0.0952381	0.512821
0.229716	0.774544		13	1		276	367		40	38		0.375	0.526316
0.119615	0.788878		19	4		398	253		73	27		0.205479	0.740741
0.0951293	0.809207		20	7		310	265		69	27		0.15942	0.740741
0.192371	0.57948		5	7		1886	525		248	30		0.0604839	0.666667
0.140215	0.619583		9	4		890	224		236	27		0.0381356	0.518519
0.0962101	0.57453		6	8		425	162		68	30		0.205882	0.4
0.268219	0.481312		4	9		316	107		182	21		0.0384615	0.571429
0.193469	0.520756		10	9		3865	362		558	27		0.0591398	0.740741
0.206699	0.579292		18	7		584	404		231	37		0.034632	0.540541
0.373523	0.541487		1	3		320	145		90	28		0.155556	0.357143
0.177139	0.477742		9	4		274	85		81	23		0.0617284	0.391304
0.201976	0.436851		4	2		151	301		88	41		0.0227273	0.463415
0.211036	0.572311		6	8		1705	130		283	30		0.0600707	0.266667
0.10703	0.564447		13	7		291	357		67	29		0.238806	0.689655
0.293712	0.568419		4	2		311	539		75	31		0.146667	0.612903
0.249637	0.538524		3	12		169	552		36	36		0.444444	0.527778
0.172883	0.539945		13	10		486	1084		98	88		0.163265	0.215909
0.609683	0.628923		1	11		210	653		53	44		0.188679	0.431818
0.154918	0.606235		12	2		370	862		55	52		0.218182	0.365385
0.142808	0.451692		10	2		763	1350		119	80		0.168067	0.2375
0.26325	0.461347		3	6		319	491		103	31		0.0679612	0.612903
0.278473	0.452143		3	8		271	1642		53	100		0.207547	0.19
0.28916	0.452824		11	3		311	1533		126	93		0.0714286	0.204301
0.342896	0.566528		6	3		1068	660		192	43		0.0416667	0.44186
0.339444	0.270697		11	4		167	382		92	38		0.0217391	0.447368
0.284731	0.533337		9	7		188	256		83	54		0.060241	0.148148
0.527582	0.687808		5	4		185	263		44	23		0.318182	0.73913
0.387778	0.669433		8	12		193	391		34	37		0.352941	0.459459
0.180455	0.682592		5	13		1037	227		154	24		0.149351	0.708333
0.11145	0.661411		12	12		183	120		49	25		0.326531	0.32
0.0804151	0.676466		10	21		818	388		113	32		0.292035	0.53125
0.461137	0.705912		4	3		835	397		122	37		0.204918	0.459459
0.601369	0.747085		3	16		255	129		48	28		0.5625	0.214286
0.224005	0.647044		6	2		179	221		62	27		0.129032	0.62963
0.242879	0.775265		16	2		319	166		40	25		0.55	0.68
0.226798	0.651251		3	3		601	160		81	25		0.444444	0.68
	0.728255			8		1293	218		219	22		0.0821918	0.772727
	0.785193			11		155	251		103	38		0.0485437	0.342105
	0.761664			10		445	106		152	23		0.0526316	0.347826
	0.620596			8		316	521		51	40		0.313725	0.425
	0.578256			3		718	368		93	24		0.172043	1.29167
	0.625211			10		1710	266		271	34		0.0627306	0.441176
	0.731082			2		501	888		58	66		0.431034	0.454545
	0.655378			4		414	347		202	31		0.0643564	0.483871
	0.536309			4		378	588		75	51		0.173333	0.607843
	0.666601			7		2345	832		571	37		0.0262697	0.837838
	0.662249			6		240	298		65	15		0.2	2.06667
	0.601899			7		1770	290		300	19		0.0566667	1.42105
	0.689234			7		400	235		85	19		0.176471	1.21053
	0.525866			8		340	273		83	19		0.060241	1.42105
	0.663536			8		506	396		157	22		0.044586	1.40909
	0.708648			10		623	294		81	14		0.234568	2.21429
	0.609221			11		613	433		170	20		0.0352941	1.55
	0.552089			18		167	256		96	16		0.0833333	1.4375
	0.573413			11		179	286		103	17		0.038835	1.52941
	0.93819			24		277	385		79	19		0.113924	1.63158
	0.951221			3		2174	367		351	20		0.0797721	1.55
	0.86934			7		567	940		214	40		0.0327103	0.775
	0.911132			1		1086	479		201	27		0.0497512	1.14815
	0.69731			13		1107	412		178	25		0.0730337	0.92
	0.884663			18		250	482		39	25		0.230769	1.24
	0.823453			12		348	264		89	23		0.134831	0.695652
	0.609252			8		646	391		75	22		0.253333	1.40909
	0.583538					215	220		52	16		0.230769	1.625
						196	1285		45	69		0.222222	0.449275
						480	300		129	17		0.0852713	1.82353
						447	221		105	15		0.142857	1.53333
						331	118		69	31		0.15942	0.258065
						398	113		124	25		0.0967742	0.32
						2715	132		288	18		0.107639	0.777778
						872	117		236	28		0.059322	0.25
						1246	127		156	24		0.0961538	0.25
						199	414		87	83		0.0344828	0.0722892
						825	119		237	20		0.0464135	0.7
						1424	322		289	59		0.0484429	0.118644
						380	368		157	76		0.11465	0.184211
						1637	230		449	30		0.0244989	0.466667
						254	217		55	37		0.345455	0.378378
						3380	903		371	128		0.083558	0.109375
						943	310		347	38		0.0345821	0.368421
						700	931		120	124		0.108333	0.112903
						314	121		42	27		0.309524	0.296296
						132	93		25	23		0.52	0.26087
						174	137		31	26		0.354839	0.230769
						230	203		32	42		0.6875	0.238095
						106	299		17	51		0.823529	0.27451
						201	172		19	23		1.57895	0.608696
						169	124		35	29		0.6	0.241379
						154	205		37	46		0.459459	0.304348
						520	146		72	22		0.416667	0.636364
						186	137		19	28		0.894737	0.5
						114	101		35	21		0.342857	0.333333
						188	111		39	20		0.25641	0.6
						128	97		21	19		1	0.631579
						104	390		17	47		0.647059	0.276596
						413	239		26	29		1.88462	0.448276
						208	338		20	31		1.05	0.419355
						99	353		16	36		0.75	0.361111
						361	186		43	23		0.465116	0.565217
						112	268		28	38		0.5	0.342105
						966	304		134	39		0.164179	0.333333
						862	277		82	32		0.317073	0.40625
						175	154		27	17		0.592593	0.764706
						295	197		45	21		0.488889	0.619048
						111	144		19	33		0.368421	0.363636
						116	265		32	23		0.28125	0.652174
						97	195		29	18		0.206897	0.833333
						724	426		112	53		0.223214	0.283019
						122	218		46	23		0.26087	0.652174
						146	155		31	18		0.225806	0.833333
						116	188		28	29		0.392857	0.344828
						116	236		17	25		1.29412	0.6
						94	259		14	29		1.28571	0.517241
						94	381		15	36		0.866667	0.416667
						94	423		23	34		0.304348	0.441176
						119	286		20	22		0.75	0.772727
						110	229		19	54		0.736842	0.111111
						214	303		26	54		0.846154	0.185185
						172	159		34	16		0.558824	1.0625
						1251	360		319	33		0.0658307	0.515152
						297	195		29	31		0.862069	0.290323
						146	583		19	44		1.05263	0.386364
						128	191		26	17		0.615385	1
						309	268		37	19		0.540541	0.894737
						132	244		20	30		0.6	0.433333
						154	210		18	39		1.61111	0.179487
						1201	586		90	54		0.544444	0.314815
						281	201		39	31		0.487179	0.451613
						297	446		51	33		0.333333	0.515152
						296	508		45	45		0.355556	0.377778
						131	429		21	34		0.809524	0.5
						468	209		108	31		0.240741	0.322581
						249	304		106	42		0.103774	0.357143
						234	371		54	61		0.444444	0.147541
						594	330		36	48		0.888889	0.1875
						167	1670		25	130		0.64	0.153846
						707	943		34	64		1.44118	0.3125
						380	982		36	62		0.611111	0.322581
						147	945		29	66		0.241379	0.30303
						126	887		29	66		0.275862	0.30303
						271	5286		51	332		0.254902	0.060241
						261	2796		36	199		0.555556	0.100503
						373	8214		29	315		0.965517	0.0984127
						327	3153		61	130		0.278689	0.238462
						2041	1347		136	58		0.301471	0.534483
						198	2469		20	107		0.8	0.28972
						223	1524		38	92		0.5	0.336957
						114	895		47	49		0.106383	0.632653
						237	747		25	32		0.92	0.96875
						140	1404		21	57		0.761905	0.54386
						231	1258		27	68		0.62963	0.455882
						118	2083		20	82		0.65	0.378049
						180	467		23	22		0.869565	1.40909
						155	515		26	23		0.423077	1.34783
						1522	369		249	69		0.104418	0.15942
						603	933		47	92		0.680851	0.228261
						669	463		82	79		0.378049	0.113924
						412	505		202	65		0.019802	0.169231
						271	261		147	34		0.0272109	0.352941
						158	232		91	30		0.021978	0.333333
						238	540		147	86		0.0204082	0.104651
						174	1793		51	273		0.196078	0.03663
						1069	512		268	67		0.0597015	0.134328
						155	1003		60	114		0.216667	0.105263
						1190	501		236	45		0.0720339	0.422222
						178	284		39	34		0.205128	0.5
						810	288		154	21		0.0584416	1
						381	157		129	18		0.0542636	1.16667
						146	187		88	31		0.0340909	0.290323
						554	206		201	54		0.0497512	0.203704
						285	625		70	50		0.142857	0.42
						143	225		47	44		0.12766	0.204545
						501	500		94	56		0.191489	0.375
						334	677		87	25		0.195402	1.84
						208	246		65	13		0.184615	2.69231
						356	873		71	32		0.169014	1.4375
						560	449		120	81		0.075	0.0864198
						155	216		48	32		0.104167	0.4375
						393	1155		156	36		0.0320513	1.27778
						111	226		41	22		0.146341	1.04545
						154	471		105	16		0.0571429	2.875
						208	765		81	26		0.0740741	1.76923
						576	739		175	26		0.0342857	1.76923
						388	1145		123	68		0.0487805	0.397059
						595	372		224	35		0.0267857	0.542857
						209	936		78	41		0.0897436	0.853659
						394	813		67	31		0.253731	1.22581
						415	319		83	39		0.253012	0.358974
						2054	1184		275	39		0.0618182	1.17949
						400	511		252	19		0.00793651	2.42105
						3154	553		398	37		0.0854271	1.24324
						339	423		197	32		0.035533	0.875
						269	1404		158	62		0.0253165	0.741935
						236	1360		61	65		0.163934	0.707692
						2551	970		434	50		0.0806452	0.92
						445	1148		107	33		0.11215	1.39394
						282	619		77	30		0.103896	1.53333
						576	2605		218	130		0.0321101	0.353846
						1693	2071		304	88		0.0493421	0.397727
						520	5013		186	162		0.0806452	0.216049
						180	4765		46	169		0.130435	0.207101
						982	1477		223	60		0.0717489	0.583333
						514	1072		169	47		0.035503	0.744681
						295	5281		107	212		0.0560748	0.165094
						284	1059		102	59		0.0392157	0.59322
						467	4613		191	190		0.0890052	0.184211
						405	5486		103	187		0.0679612	0.187166
						301	350		70	52		0.157143	0.365385
						951	379		108	55		0.212963	0.218182
						318	255		100	67		0.15	0.179104
						3621	265		269	35		0.0892193	0.371429
						352	1266		46	104		0.456522	0.317308
						1030	542		80	61		0.4875	0.262295
						3423	2099		327	78		0.140673	0.705128
						452	1019		233	52		0.00858369	1.05769
						1452	320		190	44		0.105263	0.318182
						319	957		124	71		0.0483871	0.309859
						1518	541		232	67		0.0905172	0.313433
						886	810		263	60		0.0418251	0.516667
						632	503		126	36		0.198413	0.611111
						361	2267		79	128		0.227848	0.453125
						3756	1990		380	87		0.0736842	0.666667
						717	5778		132	285		0.121212	0.101754
						3210	4413		364	285		0.0879121	0.0666667
						401	599		133	66		0.037594	0.393939
						509	293		189	60		0.042328	0.166667
						704	2870		162	268		0.123457	0.0820896
						6524	1473		499	222		0.102204	0.0495495
						2017	1474		200	139		0.13	0.136691
						580	309		122	60		0.0819672	0.166667
						403	302		188	37		0.0265957	0.324324
						898	449		104	122		0.192308	0.0737705
						6162	833		497	76		0.084507	0.236842
						490	292		88	64		0.181818	0.125
						2888	433		391	63		0.0358056	0.174603
						479	441		78	126		0.141026	0.0634921
						407	600		55	37		0.290909	0.972973
						736	371		105	61		0.209524	0.245902
						1113	344		241	101		0.0871369	0.0594059
						842	249		228	53		0.0438596	0.207547
						1412	204		280	48		0.0642857	0.104167
						348	178		85	44		0.2	0.181818
						612	538		232	131		0.0301724	0.0763359
						178	1655		75	214		0.12	0.158879
						274	1428		63	213		0.15873	0.122066
						322	166		85	53		0.129412	0.113208
						303	444		47	59		0.468085	0.372881
						270	198		62	40		0.16129	0.3
						862	267		118	55		0.177966	0.2
						676	203		122	74		0.147541	0.0540541
						239	618		38	78		0.342105	0.166667
						317	538		105	71		0.190476	0.183099
						230	723		45	75		0.266667	0.2
						2184	1149		199	185		0.125628	0.0864865
						2203	1300		327	183		0.0550459	0.0874317
						223	372		85	55		0.105882	0.218182
						270	216		149	56		0.0604027	0.214286
						236	7437		108	287		0.0462963	0.149826
						231	1494		66	77		0.121212	0.480519
						87	5921		32	284		0.125	0.133803
						401	679		46	100		0.413043	0.18
						104	350		41	149		0.268293	0.0805369
						100	771		26	56		0.423077	0.660714
						88	349		24	13		0.416667	4
						292	3215		136	165		0.0735294	0.218182
						87	950		19	135		0.684211	0.0888889
						773	480		76	35		0.355263	0.8
						91	1178		17	77		0.647059	0.636364
						740	581		88	25		0.272727	1.96
						178	658		24	33		0.75	1.48485
						87	452		12	35		1	0.857143
						126	1329		24	62		0.625	0.790323
						174	357		20	53		1.2	0.207547
						120	3641		40	193		0.25	0.253886
						175	645		33	42		0.393939	0.904762
						339	794		70	64		0.185714	0.515625
						114	6305		65	297		0.138462	0.164983
						85	582		23	48		0.521739	0.645833
						117	1054		49	105		0.102041	0.361905
						238	9717		36	312		0.416667	0.157051
						168	5035		64	232		0.203125	0.211207
						141	503		40	35		0.35	0.971429
						1033	6013		99	263		0.353535	0.174905
						436	632		35	125		0.914286	0.088
						353	2082		57	112		0.421053	0.410714
						557	572		46	54		0.630435	0.611111
						286	405		56	64		0.321429	0.296875
						175	5332		29	232		0.517241	0.241379
						120	711		13	46		1.69231	0.652174
						613	710		51	43		0.54902	1.02326
						751	875		91	38		0.351648	1.21053
						129	781		28	24		0.357143	2.33333
						146	1474		28	40		0.714286	1.7
						256	917		95	39		0.147368	0.871795
						299	7703		41	189		0.463415	0.386243
						202	2822		40	67		0.25	1.08955
						735	289		78	20		0.282051	1.1
						201	297		14	21		1.92857	1.52381
						447	1773		56	54		0.357143	1.33333
						262	534		33	27		0.636364	1.51852
						341	1403		46	57		0.456522	1
						149	567		27	51		0.444444	0.54902
						1108	238		80	29		0.5375	0.482759
						655	564		73	44		0.30137	0.590909
						162	775		26	28		0.730769	1.92857
						251	288		40	23		0.3	1.04348
						459	774		152	28		0.0657895	1.39286
						464	1100		69	38		0.246377	1.44737
						222	1065		39	98		0.461538	0.459184
						205	1243		43	32		0.302326	2.25
						229	2274		60	165		0.233333	0.242424
						167	825		18	56		1.33333	0.392857
						1507	347		144	33		0.277778	0.484848
						704	594		45	39		0.711111	0.769231
						911	857		100	110		0.38	0.181818
						159	838		26	72		0.5	0.194444
						229	260		31	46		0.677419	0.173913
						179	326		30	39		0.466667	0.358974
						367	904		61	51		0.344262	0.784314
						355	404		73	49		0.178082	0.428571
						150	698		22	58		0.772727	1.10345
						141	623		24	117		0.916667	0.196581
						188	373		26	129		0.846154	0.0542636
						132	354		16	80		1.0625	0.1
						150	623		25	60		0.56	0.533333
						609	506		38	42		0.947368	0.404762
						1852	503		234	20		0.106838	2.75
						485	1073		54	31		0.425926	1.77419
						150	1811		15	58		1.13333	0.948276
						255	332		53	44		0.283019	0.431818
						178	1680		65	45		0.169231	1.22222
						106	1832		34	64		0.176471	0.859375
						237	3703		64	120		0.09375	0.45
						111	370		59	101		0.0508475	0.148515
						193	706		65	222		0.123077	0.0810811
						220	207		26	60		0.576923	0.216667
						106	206		34	44		0.205882	0.159091
						100	251		51	49		0.0588235	0.285714
						107	1192		47	132		0.12766	0.128788
						234	300		52	54		0.25	0.185185
						159	487		68	54		0.117647	0.333333
						318	1130		77	75		0.142857	1.02667
						344	398		61	17		0.278689	3.23529
						293	178		61	15		0.245902	1.4
						465	217		93	51		0.16129	0.333333
						104	291		34	35		0.117647	0.428571
						333	229		63	14		0.174603	2.28571
						1005	1230		130	29		0.215385	2.65517
						109	207		39	26		0.153846	0.538462
						527	304		143	12		0.0769231	3.66667
						221	291		117	24		0.034188	0.875
						113	171		47	27		0.106383	0.481481
						128	521		37	59		0.189189	0.338983
						182	179		50	22		0.16	0.681818
						139	646		24	80		0.666667	0.525
						134	1154		20	59		0.8	1.20339
						123	6616		31	200		0.290323	0.305
						168	259		43	58		0.27907	0.413793
						565	867		82	27		0.207317	2.48148
						234	350		40	20		0.375	1.8
						120	434		50	36		0.06	0.972222
						157	858		58	27		0.103448	2.7037
						217	269		122	25		0.0409836	0.92
						124	489		27	32		0.333333	1.21875
						688	816		183	42		0.0765027	1.21429
						1066	343		223	37		0.0941704	0.567568
						300	2665		82	105		0.097561	0.485714
						159	1378		86	87		0.0697674	0.241379
						98	1185		37	80		0.216216	0.2625
						291	1379		72	64		0.166667	0.796875
						510	445		73	25		0.219178	1.24
						412	727		73	50		0.30137	0.42
						2016	322		134	48		0.358209	0.208333
						296	6467		49	257		0.408163	0.194553
						2706	6009		200	155		0.24	0.322581
						271	2842		40	195		0.375	0.246154
						332	16084		36	366		0.555556	0.150273
						184	1644		60	90		0.233333	0.488889
						244	11010		34	375		0.529412	0.114667
						290	1270		35	139		0.685714	0.0791367
						2812	7351		205	163		0.229268	0.466258
						351	614		37	20		0.756757	3.8
						315	847		112	36		0.0803571	2.11111
						169	1289		32	35		0.34375	2.17143
						3429	1553		321	41		0.0965732	1.85366
						304	1268		32	34		0.75	2.23529
						312	1147		59	30		0.40678	2.53333
						183	757		36	36		0.444444	1.91667
						304	762		51	44		0.54902	0.75
						247	619		33	22		0.484848	2.86364
						2070	1733		193	43		0.243523	1.46512
						511	4907		59	121		0.491525	0.61157
						2084	610		130	30		0.361538	2.46667
						598	837		42	38		0.714286	1.94737
						422	1338		88	37		0.147727	2
						167	1514		27	38		0.259259	1.94737
						339	1214		83	37		0.144578	2
						134	1144		29	31		0.448276	2.3871
						489	525		90	23		0.188889	2.17391
						432	487		44	35		0.590909	1.11429
						281	1598		22	77		1.18182	0.779221
						400	2341		49	134		0.469388	0.492537
						1231	2816		120	70		0.216667	0.857143
						301	942		19	25		1.36842	2.4
						254	638		125	15		0.048	4.33333
						434	1151		73	27		0.191781	2.40741
						518	1519		168	32		0.0892857	2.21875
						283	599		78	33		0.205128	0.787879
						194	999		34	33		0.411765	1.33333
						268	1145		79	55		0.113924	0.909091
						355	732		52	26		0.461538	2
						345	1160		67	37		0.179104	1.7027
						534	1161		81	27		0.259259	2.33333
						1499	3377		187	94		0.106952	0.787234
						333	1831		65	34		0.230769	2.17647
						278	830		69	24		0.173913	2.16667
						371	1337		65	35		0.2	2.11429
						400	5756		101	144		0.158416	0.465278
						341	6222		114	115		0.0789474	0.643478
						506	1790		82	33		0.182927	2.24242
						235	661		67	29		0.104478	1.34483
						324	910		64	54		0.125	1.03704
						6732	3018		388	64		0.121134	1.09375
						345	1221		84	30		0.214286	2.33333
						817	664		120	21		0.133333	3.33333
						672	1563		70	35		0.357143	2
						546	673		69	27		0.217391	2.59259
						1184	1831		124	44		0.379032	1.59091
						1651	338		176	18		0.261364	2.5
						260	621		81	19		0.234568	3.68421
						379	15115		50	280		0.4	0.25
						279	2003		43	49		0.348837	1.42857
						1060	5714		158	241		0.132911	0.145228
						4757	872		278	41		0.230216	0.853659
						1631	931		220	37		0.0954545	0.945946
						2767	850		209	48		0.177033	0.729167
						335	5005		66	202		0.151515	0.158416
						716	1251		98	57		0.204082	0.561404
						432	1022		73	47		0.342466	0.680851
						406	927		74	39		0.216216	0.820513
						5048	1772		228	97		0.188596	0.268041
						1552	1472		142	51		0.161972	0.705882
						268	1001		73	51		0.232877	0.509804
						209	1319		68	54		0.0735294	0.666667
						237	1091		21	43		0.952381	0.837209
						310	531		32	26		0.625	1.38462
						1279	752		194	33		0.113402	1.09091
						290	4669		28	160		0.928571	0.225
						213	1379		41	63		0.341463	0.571429
						470	1023		88	39		0.193182	0.923077
						3910	856		293	43		0.146758	0.837209
						633	890		86	35		0.383721	1.02857
						355	1252		122	53		0.131148	0.679245
						238	909		35	62		0.714286	0.403226
						208	576		85	36		0.0588235	0.694444
						479	490		35	30		0.657143	0.833333
						5100	275		334	38		0.125749	0.289474
						684	553		84	34		0.428571	0.735294
						889	805		51	74		0.803922	0.337838
						726	286		94	23		0.234043	1.08696
						4526	553		431	37		0.0974478	0.756757
						358	738		76	45		0.184211	0.622222
						706	272		48	25		0.604167	0.72
						678	881		144	53		0.0972222	0.528302
						835	745		103	38		0.194175	0.736842
						248	259		83	34		0.060241	0.352941
						180	704		99	36		0.0505051	0.777778
						156	536		54	38		0.0925926	0.578947
						351	1232		143	87		0.0559441	0.321839
						174	733		44	49		0.204545	0.571429
						186	709		40	40		0.425	0.55
						1026	525		193	29		0.0777202	0.965517
						343	731		61	52		0.163934	0.538462
						138	379		54	28		0.148148	0.785714
						146	375		29	26		0.517241	1.07692
						9536	1053		515	80		0.0640777	0.275
						150	911		48	53		0.145833	0.528302
						229	402		53	24		0.283019	1.16667
						148	414		47	35		0.212766	0.742857
						1345	372		108	30		0.296296	0.8
						119	386		39	60		0.205128	0.183333
						191	338		39	54		0.282051	0.203704
						135	603		45	34		0.244444	0.823529
						150	1732		46	90		0.130435	0.355556
						346	503		46	29		0.347826	1.10345
						253	769		69	46		0.188406	0.695652
						181	445		39	24		0.333333	1.33333
						226	306		54	15		0.203704	2.13333
						140	256		31	15		0.387097	2.13333
						312	242		84	12		0.142857	2.66667
						365	270		77	16		0.168831	2
						122	821		49	38		0.142857	0.842105
						465	234		96	12		0.197917	2.66667
						157	660		41	31		0.243902	1.25806
						298	520		38	33		0.736842	1.18182
						1037	1598		111	78		0.252252	0.5
						292	384		64	23		0.265625	1.69565
						175	1284		16	56		1.0625	0.696429
						2447	609		230	34		0.121739	1.14706
						2345	271		171	13		0.19883	3
						452	323		110	18		0.1	2.16667
						1001	229		157	12		0.089172	3.25
						520	598		80	45		0.275	0.866667
						5061	402		451	31		0.075388	1.25806
						370	557		225	56		0.00888889	0.446429
						231	320		111	25		0.036036	0.88
						331	292		68	24		0.191176	0.916667
						1003	345		150	19		0.12	2.36842
						580	472		142	20		0.084507	2.25
						925	412		131	30		0.167939	1
						325	273		83	17		0.0963855	2.64706
						412	1634		113	54		0.123894	0.833333
						212	653		72	28		0.152778	1.60714
						211	391		59	20		0.186441	1.6
						582	1092		108	32		0.157407	1.40625
						498	867		118	31		0.110169	1.45161
						814	737		53	28		0.584906	1.60714
						1850	335		250	14		0.104	3.21429
						2121	342		166	14		0.204819	3.21429
						233	670		40	25		0.45	1.8
						336	468		75	20		0.12	2.25
						499	309		72	14		0.166667	3.21429
						965	294		69	25		0.391304	0.96
						193	1358		70	50		0.0428571	0.94
						285	2295		101	75		0.0594059	0.626667
						359	421		70	19		0.157143	2.47368
						230	434		45	19		0.244444	2.47368
						1134	1314		124	56		0.25	0.839286
						380	739		62	37		0.177419	1.27027
						645	747		115	40		0.165217	1.175
						2075	565		226	25		0.123894	1.88
						447	306		86	18		0.116279	2.27778
						2608	1424		98	45		0.5	1.04444
						198	601		26	53		0.5	0.660377
						196	517		31	38		0.580645	1.26316
						277	212		37	19		0.594595	1.26316
						452	457		85	19		0.164706	2.52632
						225	461		43	17		0.372093	2.82353
						754	388		124	23		0.129032	2
						200	782		57	30		0.175439	1.6
						1314	560		205	33		0.0731707	1.45455
						1583	652		76	22		0.381579	2.18182
						953	490		86	19		0.232558	2.52632
						3332	241		214	12		0.140187	3.91667
						413	311		100	15		0.08	3.2
						509	1036		114	41		0.0526316	1.17073
						1280	176		101	8		0.188119	6
						1864	519		246	20		0.126016	2.4
						313	799		91	31		0.120879	1.54839
						1599	269		245	12		0.0489796	4
						447	305		81	14		0.222222	3.42857
						687	194		107	26		0.11215	0.615385
						201	281		47	24		0.191489	1.16667
						369	351		94	12		0.117021	4
						409	219		127	17		0.0551181	1.82353
						4561	197		378	15		0.153439	1.73333
						3472	235		245	21		0.171429	1.19048
						337	2136		59	120		0.372881	0.4
						1556	7788		174	217		0.189655	0.221198
						3067	642		318	40		0.0786164	1
						210	610		46	40		0.23913	0.775
						375	1296		53	70		0.264151	0.671429
						401	4244		65	137		0.169231	0.343066
						1229	1433		132	90		0.265152	0.522222
						192	762		28	77		0.392857	0.350649
						236	491		42	33		0.238095	1.42424
						344	2964		59	135		0.288136	0.348148
						270	13420		47	486		0.361702	0.102881
						222	592		42	68		0.261905	0.426471
						627	1348		99	68		0.131313	0.573529
						203	780		43	34		0.162791	1.14706
						2435	1171		269	54		0.070632	0.722222
						2295	372		187	17		0.224599	2.29412
						825	894		112	32		0.178571	1.21875
						273	379		143	16		0.048951	2.4375
						423	308		93	15		0.139785	2.6
						243	942		63	57		0.238095	0.684211
						1311	252		285	15		0.0561404	2.6
						628	267		183	19		0.0546448	2.05263
						281	728		85	34		0.0823529	1.14706
						379	324		54	17		0.203704	2.29412
						736	293		104	57		0.0865385	0.368421
						516	504		114	19		0.0438596	2.47368
						4373	298		184	34		0.195652	0.647059
						1410	355		177	30		0.107345	0.833333
						4445	589		177	21		0.265537	2.2381
						1978	453		191	17		0.0732984	2.76471
						491	573		95	20		0.178947	2.35
						234	499		80	20		0.075	2.35
						328	858		48	33		0.208333	1.42424
						212	328		40	15		0.225	3.13333
						821	1686		130	67		0.2	0.701493
						2579	971		252	37		0.107143	1.27027
						306	595		30	32		0.7	1.46875
						312	612		63	29		0.142857	1.62069
						136	488		117	19		0.025641	2.47368
						148	763		47	33		0.170213	1.42424
						181	235		53	14		0.188679	3.35714
						422	246		44	18		0.522727	1.61111
						190	348		35	15		0.571429	3.13333
						204	1393		49	54		0.306122	0.87037
						185	2355		30	82		0.7	0.573171
						197	1533		44	52		0.340909	0.903846
						174	839		44	27		0.454545	1.74074
						160	325		27	14		0.666667	3.35714
						134	850		28	36		0.428571	1.30556
						447	320		51	14		0.54902	3.35714
						1157	528		115	22		0.278261	2.13636
						343	544		58	26		0.327586	1.80769
						557	749		73	29		0.273973	1.62069
						422	428		61	19		0.213115	2.47368
						1740	387		147	24		0.238095	1.95833
						2072	2871		108	123		0.37963	0.382114
							1816			90			0.522222
							856			32			1.46875
							387			15			3.13333
							1950			63			0.746032
							355			15			3.13333
							1177			45			1.04444

## Sheet: Fig4
Fig4p
WT	Harmaline	Grid2
0.192821	0.579532	0.820222
0.372825	0.444081	0.851814
0.451341	0.146111	0.888513
0.218761	0.356253	0.712646
0.145422	0.313367	0.855344
0.293231	0.515641	0.949203
0.178776	0.553643	0.833476
0.16712	0.636642	0.788879
0.19675	0.342964	0.830595
0.364721	0.591777	0.86738

## Sheet: Fig6
Fig6c			Fig6d			Fig6g			Fig6h
NNC 55-0396(20mg/kg)			NNC 55-0396(20mg/kg)			NNC 55-0396(20mg/kg)			NNC 55-0396(20mg/kg)
Harmaline (n=7)			Harmaline (n=7)			Grid2(n=7)			Grid2(n=7)
Baseline	Treatment		Baseline	Treatment		Baseline	Treatment		Baseline	Treatment
0.935622	0.229101		1	0.244865		0.312961	0.37788		1	1.20743
1.41891	0.475766		1	0.335304		0.265186	0.249266		1	0.939968
0.724238	0.557438		1	0.769689		0.234502	0.216384		1	0.922739
2.1287	0.250384		1	0.117623		0.356726	0.248632		1	0.696984
1.1034	0.376593		1	0.341302		0.213018	0.287913		1	1.35159
1.07886	0.29241		1	0.271037		0.22933	0.272812		1	1.1896
3.2858	1.04914		1	0.319296		0.284729	0.245685		1	0.862872

## Sheet: Fig8
Fig8f and g								Fig 8e
	Patient	Event	FDI EEG	FDI EMG	Center frequency (EEG)	Center frequency (EMG)			Mean EEG FDR
Responder	1	'22- L Spirogram 2070-2189 '	0.260521	0.285733	5.3	5.6			Responder	Non-responder
		'24- L Drawing straight line 2494-2559 '	0.153865	0.215411	5.5	5.5		1	0.171837	4.175
		'26- L Writing 2748-2828 '	0.250024	0.300029	5.6	5.6		2	0.313361	0.876386
		'21- R Spirogram 1857-2013 '	0.128212	0.10898	5.5	5.8		3	0.430108	0.833989
		'23- R Drawing straight line 2374-2439 '	0.0923188	0.0307729	5.9	6.2		4	0.190223	0.744395
		'25- R Writing 2627-2716 '	0.14608	0.134843	6.7	6.8		5	0.376654	0.988328
	2	'23- L Spirogram 1912-1952 '	0.375073	0.0250049	4.7	4.7		6	0.512279	1.03612
		'25- L Drawing straight line 2120-2171 '	0.352995	0.254941	4.3	4.3		7	0.563665	1.33319
		'22- R Spirogram 1797-1858 '	0.245933	0.114769	4.4	4.4		8	0.35437	0.539539
		'24- R Drawing straight line 2021-2089 '	0.279444	0.338274	4.4	4.4		9	0.76028	0.637836
	3	'27- L Spirogram 2672-3023 '	0.339039	0.324794	6.4	6.3		10	0.600784	0.864439
		'29- L Drawing straight line 3312-3421 '	0.394524	0.715648	6.3	5.5
		'31- L Writing 3635-3799 '	0.65247	0.420752	9	8
		'26- R Spirogram 2305-2602 '	0.457925	0.178456	6.5	6.1
		'28- R Drawing straight line 3074-3255 '	0.403332	0.287305	6.3	6
		'30- R Writing 3489-3588 '	0.33336	0.363665	6.4	6.8
	4	'23- L Spirogram 1957-2093 '	0.147067	0.0147067	3.3	3.3
		'25- L Take a spoon to drink 2272-2355 '	0.506072	0.204839	8.5	7.5
		'22- R Spirogram 1762-1930 '	0.017858	0.017858	3.5	3.6
		'24- R Take a spoon to drink 2155-2244 '	0.0898955	0	3.7	3.3
	5	'25- L Spirogram 2268-2373 '	0.0952452	0	4.1	3.1
		'28- R Writing (Pen Grisp) 2709-2863 '	0.0974075	2.64299	4.1	4.4
		24- R Spirogram 2128-2232 '	0.778905	0.557734	6.3	5.7
		'27- R Writing (Brush Grisp) 2482-2639 '	0.535058	0.305748	6.3	6.2
	6	'26- L Spirogram 2nd 2447-2556 '	0.816572	0.623898	6.8	6.3
		'28- L Writing 2799-2905 '	0.330213	0.377386	3.2	3.8
		'25- R Spirogram 2022-2156 '	0.328377	0	3.2	3.3
		'27- R Writing 2614-2729 '	0.573952	2.00883	5.5	4.5
	7	27- L Drawing straight line 2nd 2992-3059 '	0.56723	0.417959	6.6	5.9
		'30- L Spirogram 2nd 3214-3268 '	0.6112	0.425988	6.7	6.3
		'26- R Drawing straight line 2nd 2913-2962 '	0.530697	0.57152	8.5	9.1
		'29- R Spirogram 2nd 3129-3184 '	0.545532	0.381872	7.3	7.3
	8	'25- L Spirogram 2080-2199 '	0.126059	0	3.4	3.1
		'27- L Drawing straight line 2405-2482 '	0.441603	0.584475	6.4	5.6
		'30- L Writing (font size_large) 2937-3046 '	0.495448	0.376174	6.1	5.8
	9	'25- L Spirogram 2107-2278 '	0.660849	0.631608	7.1	6.2
		'27- L Drawing straight line 2481-2576 '	0.505305	0.610577	8.5	7.6
		'24- R Spirogram 1896-2071 '	1.68579	2.26296	3.9	4.5
		'26- R Drawing straight line 2341-2440 '	0.565701	0.535396	7.8	8
		'28- R controlling the mouse 2680-2766 '	0.383756	0.604706	7.7	8.7
	10	'27- L Spirogram 2357-2578 '	2.4028	0.628982	4.6	3.6
		'30- L Drawing straight line 2799-2869 '	0.514343	0.571492	5.3	4.8
		'33- L_writing 3254-3334 '	0.362535	0.51255	5.8	5
		'36- L_holding plate 3562-3638 '	0.368459	0.184229	6.4	5.4
		26- R Spirogram 2178-2305 '	0.24411	0.133867	3.4	3.4
		'29- R Drawing straight line 2693-2752 '	0.0508542	0.23732	3.4	3.4
		'32- R_writing 3079-3193 '	0.254403	1.27202	3.4	3.4
		'35- R_holding plate 3473-3542 '	0.608765	0.652248	11.4	11.4
Non-responder	1	Tremor event - Spirogram 1082-1247'	0.781855	1.2546	4.4	4.1
		Tremor event - Unlocking 1373-1416'	2.46556	0.837361	4.7	5.2
		Tremor event - holding plate 1529-1617'	2.43203	1.48877	4.4	4.3
		Tremor event - Take a spoon to drink 1734-1796'	1.54858	0	4	3.1
	2	'24- R Spirogram 2190-2575 '	0.145457	1.28834	4.2	4.3
		'26- R drawing straight line 3012-3101 '	1.75296	0.685453	4.4	4.4
		'25- L Spirogram 2668-2954 '	0.804218	0.419592	5.8	5.9
		'27- L drawing straight line 3136-3207 '	0.802905	0.478926	5.9	6
	3	Tremor event - Drinking 863-939'	0.657962	0.579007	6.8	6.7
		Tremor event -Drinking 1016-1079'	0.47625	0.508	7.5	7.6
		'Tremor event - spirogram 1172-1231'	0.762813	0.440736	6.8	7.5
		Tremor event - Writing 1336-1475'	1.43893	0.0143893	4	3.1
	4	Tremor event - holding 1038-1101'	0.428625	0.3175	6.9	6.7
		Tremor event - holding bowl 1108-1158'	1.06017	1.88029	5.2	5.2
	5	'26- L Spirogram 2462-2642 '	1.61674	0.933374	3.9	3.9
		'29- L Carrying plastic cup water 2029-2116 '	0.60925	0.655231	7.9	6.9
		'25- R Spirogram 2249-2428 '	1.18441	0.00558684	4.3	3.6
		'28- R Carrying plastic cup water 1928-1998 '	0.542918	2.84317	5.4	5.1
	6	'7- L Kinetic 463-533 '	0.985824	0.342895	5.4	5.2
		'23- L Spirogram 2008-2134 '	0.881007	0.325417	4.8	5.4
		'6- R Kinetic 372-450 '	1.42322	0.256436	4.6	5.5
		'22- R Spirogram 1887-1990 '	0.854434	0.378669	5.8	5.5
	7	'29- L Hold plate center 2024-2100 '	0.565848	0.0263185	3.3	3.3
		'31- L Hold plate side 2328-2420 '	1.02183	0.0108705	3.7	3.1
		'28- R Hold plate center 1922-1999 '	2.02618	0	4.1	3.3
		'30- R Hold plate side 2180-2276 '	1.71889	0.0833401	4.3	3.8
	8	'25- L Spirogram 2320-2589 '	0.550202	0.468415	9.2	8.9
		'27- L Drawing straight line 2795-2879 '	0.226212	0.0595293	3.3	3.4
		'29- L hold a piece of paper 3034-3103 '	0.521798	0.0144944	3.8	3.3
		'24- R Spirogram 2081-2277 '	0.494918	0.464304	10.3	9.6
		'26- R Drawing straight line 2680-2748 '	0.897162	0.0147076	3.8	3.4
		'28- R hold a piece of paper 2937-3001 '	0.546942	0.515688	7.7	7.3
	9	'24- R Spirogram 1970-2070 '	0.690054	0.560044	6.4	6.3
		'26- R Drawing straight line 2300-2361 '	0.557448	0.639426	6.3	5.7
		'28- R holding plate (with 30ml water) 2528-2597 '	0.652248	0.434832	6.5	7
		'30- R holding plate 2630-2696 '	0.651592	0.606132	9.8	10
	10	'20- L Spirogram 1482-1599 '	0.726544	0.470117	8.1	7.2
		'22- L Drawing straight line 1753-1802 '	0.775634	0.449051	7.7	7.3
		'24- L Repouring 2005-2092 '	0.942613	0.494297	7.1	6.8
		'19- R Spirogram 1343-1448 '	0.733388	0	3.2	3.1
		'21- R Drawing straight line 1650-1710 '	0.500065	0.416721	8.6	7.6
		'23- R Repouring 1893-1954 '	1.50839	0.278724	4.1	3.6

## Sheet: Patient Demographics
	DN (drug no response)								TETRAS Score			TETRAS after treatment				TETRAS improvement				Maximal challenge dose (for TETRAS after treatment)
				Age	Gender	Age of Onset	Disease Duration		Part1	Part2	Total score	Part1	Part2	Total score		Points of improvement	Improve percentage (%)			mg/day
		1	Patient 1	66.9671	M	63.7041	3.26301		29	27.5	56.5	29	27.5	56.5		0	0			60
		2	Patient 2	77.8658	M	60.1945	17.6712		26	30	56	26	30	56		0	0			80
		3	Patient 3	63.6795	M	56.1644	7.51507		17	22.5	39.5	17	22.5	39.5		0	0			120
		4	Patient 4	65.3781	F	62.2356	3.14247		4	3	7	4	3	7		0	0			60
		5	Patient 5	77.8658	F	68.1178	9.74795		27	17	44	27	12.5	39.5		4.5	11.3924			180
		6	Patient 6	80.4904	F	50.0685	30.4219		30	30	60	27	26.5	53.5		6.5	12.1495			60
		7	Patient 7	67.5945	F	45.0548	22.5397		22	11.5	33.5	22	11.5	33.5		0	0			60
		8	Patient 8	19.9973	F	13.1123	6.88493		12	14.5	26.5	14.5	19.5	34		-7.5	-22.0588			120
		9	Patient 9	71.7452	F	71.5014	0.243836		3	5.5	8.5	3	5.5	8.5		0	0			120
		10	Patient 10	70.5233	F	69.9205	0.60274		7	9.5	16.5	7	9.5	16.5		0	0
	DY (drug responsive)
				Age	Gender	Age of Onset	Disease Duration		Part1	Part2	Total score	Part1	Part2	Total score		Points of improvement	Improve percentage (%)			Maintenance Dose (mg/day)
		1	Patient 1	64.5288	M	44.337	20.1918		33	34.5	67.5	20	22.5	42.5		25	58.8235			30
		2	Patient 2	75.0849	M	40.6192	34.4658		38	41	79	35	31	66		13	19.697			60
		3	Patient 3	61.8411	M	55.8274	6.0137		28	26	54	24	19.5	43.5		10.5	24.1379			20
		4	Patient 4	65.0767	F	20.1123	44.9644		25	23.5	48.5	15	12.5	27.5		21	76.3636			60
		5	Patient 5	54.3507	M	49.2247	5.12603		10	11	21	9	6	15		6	40			60
		6	Patient 6	63.8274	M	43.7781	20.0493		16	17	33	6	4.5	10.5		22.5	214.286			30
		7	Patient 7	62.1534	M	61.4082	0.745205		8	21.5	29.5	2	7.5	9.5		20	210.526			30
		8	Patient 8	64.6247	F	63.3534	1.27123		20	16	36	10	8.5	18.5		17.5	94.5946			60
		9	Patient 9	62.3644	F	57.274	5.09041		15	19.5	34.5	5	5	10		24.5	245			20
		10	Patient 10	68.2411	M	63.9068	4.33425		27	20.5	47.5	13	6.5	19.5		28	143.59			10

## Sheet: FigS2
FigS2c					FigS2d					FigS2g					FigS2h
Propranolol(20mg/kg)					Propranolol(20mg/kg)					Propranolol(40mg/kg)					Propranolol(40mg/kg)
Harmaline (n=8)		Grid2(n=8)			Harmaline (n=8)		Grid2(n=8)			Harmaline (n=8)		Grid2(n=8)			Harmaline (n=8)		Grid2(n=8)
Baseline	Treatment	Baseline	Treatment		Baseline	Treatment	Baseline	Treatment		Baseline	Treatment	Baseline	Treatment		Baseline	Treatment	Baseline	Treatment
1.218	0.01514	0.1964	0.1696		1	0.0124302	1	0.863544		0.92	0.14	0.1121	0.09095		1	0.152174	1	0.811329
1.021	0.5749	0.1353	0.1565		1	0.563075	1	1.15669		1.57	0.14	0.07243	0.1377		1	0.089172	1	1.90115
2.483	0.003615	0.1471	0.2161		1	0.0014559	1	1.46907		0.79	0.24	0.09847	0.1015		1	0.303797	1	1.03077
1.985	0.4775	0.2873	0.2848		1	0.240554	1	0.991298		4.21	0.19	0.1617	0.3084		1	0.0451306	1	1.90724
1.75	0.1153	0.09063	0.1681		1	0.0658857	1	1.85479		1.22	0.103	0.0951	0.2238		1	0.0844262	1	2.35331
1.33	0.1102	0.1128	0.1913		1	0.0828571	1	1.69592		0.15	0.03	0.03016	0.066		1	0.2	1	2.18833
1.9	0.1538	0.2817	0.251		1	0.0809474	1	0.891019		2.6	0.148	0.1588	0.1757		1	0.0569231	1	1.10642
0.8356	0.003392	0.1754	0.236		1	0.00405936	1	1.3455		1.5	0.11	0.1586	0.2034		1	0.0733333	1	1.28247

## Sheet: FigS3
FigS3a			FigS3b
Propranolol(10mg/kg)			Propranolol_Ratio(10mg/kg)
Grid2(n=10)			Grid2(n=10)
Baseline	Treatment		Baseline	Treatment
0.1621	0.0564		1	0.347913
0.0816	0.0442		1	0.541412
0.1401	0.1313		1	0.937615
0.1236	0.0931		1	0.753092
0.0845	0.0581		1	0.687707
0.1423	0.0749		1	0.526433
0.1822	0.1579		1	0.866314
0.1582	0.0666		1	0.420948
0.0414	0.0351		1	0.84751
0.171	0.1107		1	0.647208

## Sheet: FigS4
FigS4g_DCN to motion kinematics			FigS4m_DCN to cerebellum LFP
Harmaline	Shuffled		Harmaline	Shuffled
0.0486115	0.000926552		0.0107899	0.00946528
0.0307033	0.0175761		0.034556	0.0126422
0.0520963	0.0171463		0.0248872	0.0101048
0.0658446	0.0111618		0.0564045	0.014706
0.0402597	0.0309633		0.0511893	0.00596845
0.146506	0.0284436		0.103588	0.0175505
0.0952612	0.0119203		0.0127769	0.0171251
0.0849768	0.015336		0.0517545	0.00856057
0.06239	0.0030171		0.0548007	0.020214
0.0859441	0.00840579		0.0531629	0.00492915
0.147624	0.0114872		0.115512	0.00859768
0.254074	0.00683123		0.265109	0.00806407
0.190976	0.00431411		0.0744485	0.0110484
0.296278	0.00712402		0.195655	0.0200737
0.212287	0.0165363		0.136333	0.0220227
0.295969	0.00404897		0.107795	0.0180373
0.0367249	0.0129839		0.0357697	0.0307322
0.316138	0.0199476		0.2726	0.0150013
0.309972	0.00309003		0.269246	0.018367
0.613007	0.018041		0.545375	0.0135653
0.341199	0.0145325		0.265524	0.0348907
0.516551	0.0141715		0.49137	0.00842903
0.648477	0.0153322		0.631751	0.00433665
0.0303284	0.00309679		0.0272449	0.00691725
0.0355718	0.00167482		0.0204549	0.00588401
0.0185023	0.0138482		0.0399814	0.00896283
0.0426754	0.0296609		0.0354559	0.0317603
0.0785346	0.00184108		0.0376627	0.00424955
0.453614	0.0135288		0.191933	0.0122838
0.0494011	0.0085005		0.00612054	0.012455
0.0777715	0.00816871		0.0525033	0.00878221
0.55883	0.00554902		0.277129	2.28367e-05
0.100581	0.0053765		0.0343869	0.0213923
0.0176076	0.0184881		0.0275433	0.00540181
0.0925847	0.0104382		0.00691153	0.0101231
0.0310799	0.0119821		0.0466274	0.0106721
0.0669002	0.00778037		0.0478233	0.00309653
0.362046	0.00883283		0.286861	0.0237108
0.031314	0.0119462		0.0640075	0.00239182
0.053316	0.0133285		0.0444902	0.00980342
0.267103	0.00655656		0.0277253	0.0102942
0.0302461	0.027676		0.0737256	0.00313859
0.0149213	0.00462399		0.00876524	0.00565792
0.0778139	0.00921166		0.0800292	0.0132557
0.00656745	0.00262199		0.00474006	0.00624864
0.00743837	0.0133485		0.00289747	0.00591614
0.0596371	0.00608376		0.0151004	0.00667964
0.128348	0.00700596		0.0394323	0.0108131
0.0113073	0.0104177		0.0610865	0.0093978
0.159321	0.00221679		0.0475885	0.0296172
0.038645	0.00632601		0.0283127	0.0201024
0.0623568	0.00508539		0.0613569	0.0220767
0.0468957	0.0112783		0.00550845	0.00682666
0.0754466	0.0136072		0.066444	0.0122054
0.0536336	0.0185732		0.0598747	0.0117481
0.0390668	0.00266191		0.043063	0.00952215
0.0876291	0.0236499		0.0987611	0.0164584
0.0427797	0.00638174		0.0476205	0.00672076
0.115179	0.0285683		0.10593	0.00512523
0.0306068	0.0121811		0.0349145	0.0107149
0.12181	0.0166815		0.0127079	0.0244111

[truncated: 6 more sheets: FigS5, FigS6, FigS7, FigS8, FigS12, FigS13]
